# Supplementary material
Source: publisher figshare collection journal article supplement (https://acs.figshare.com/ndownloader/files/4780534)
Supplement: Supplementary file 1 [file 4780534]

## **SUPPORTING INFORMATION FOR:**

# **Oxidative Addition of Pd(0) to Ar-SO<sub>2</sub>R bonds: Heck Type Reactions of Sulfones**

**José Luis García Ruano,\* José Alemán, Cristina García Paredes**

*Departamento de Química Orgánica, Universidad Autónoma de  
Madrid, Cantoblanco, 28049-Madrid, Spain.*

*jose Luis.garcia.ruano@uam.es*

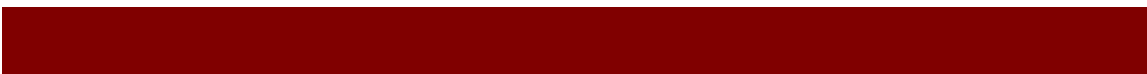

## General Methods.

$^1\text{H}$  NMR spectra were acquired at 200 or 300 MHz and  $^{13}\text{C}$  NMR were acquired at 50 or 75 MHz (unless otherwise indicated). Chemical shifts ( $\delta$ ) are reported in ppm relative to  $\text{CDCl}_3$  (7.26 and 77.0 ppm). Mass spectra (MS) were determined at ionizing voltage of 70 eV. All reactions were carried out in anhydrous solvents and under argon atmosphere. THF and  $\text{Et}_2\text{O}$  were distilled from sodium-benzophenone under argon.  $\text{CH}_2\text{Cl}_2$  was distilled from  $\text{P}_2\text{O}_5$ . Flash column chromatography was performed using silica gel Merk-60 (230-400 mesh). *n*-BuLi (2.5 M solution in hexane) and compounds **6**, **7**, **8f** and **11** were purchased from Aldrich.

## Starting materials

### Diphenyl[(phenylsulfonyl)methyl]phosphine (**10**)<sup>1</sup>

To a solution of methylphenylsulfone (234 mg, 1.5 mmol) in 5 mL of THF, was added a 2.3M solution of *n*-BuLi in hexane (0.739 mL, 1.7 mmol) at  $-78^\circ\text{C}$ . After 0.5 h chlorodiphenylphosphine (1.7 mmol) was added at  $-78^\circ\text{C}$  and the temperature warmed to room temperature. Once the material was consumed (monitored by TLC), the mixture was treated with 10 mL of saturated solution of  $\text{NH}_4\text{Cl}$  and extrated with 10 mL of  $\text{CH}_2\text{Cl}_2$ . The organic phase was washed with a saturated solution of  $\text{NaCl}$ , and dried over anhydrous  $\text{Na}_2\text{SO}_4$ . After concentration under reduce pressure, the crude mixture was purified by flash-column chromatography (*n*-hexane-AcOEt 7:3), obtaining **10** as a white solid (188 mg). Yield: 40%. IR (KBr): 2897, 1590, 1490, 1309  $\text{cm}^{-1}$ ;  $^1\text{H}$ -NMR (300

<sup>1</sup> Bordwell, F. G.; Mtthews, W. S.; Vanier, N. *J. Am. Chem. Soc.* **1975**, 97, 442.

MHz)  $\delta$ : 8.02 (dd,  $J = 7.2, 1.2$  Hz, 2H), 7.62 (t,  $J = 4.8$  Hz, 1H), 7.52 (t,  $J = 7.8$  Hz, 2H), 7.2 (m, 10H), 4.06 (d,  $J_{\text{H-P}} = 17$  Hz, 2H);  $^{13}\text{C}$ -NMR (75 MHz)  $\delta$ : 149.5 (d,  $J_{\text{C-P}} = 33$  Hz), 139.6, 134.2, 129.7, 129.1, 128.3, 125.6, 120.4, 120.3, 53.0 (d,  $J_{\text{C-P}} = 140$  Hz).

### General method for the synthesis of alkynes 8 and 9

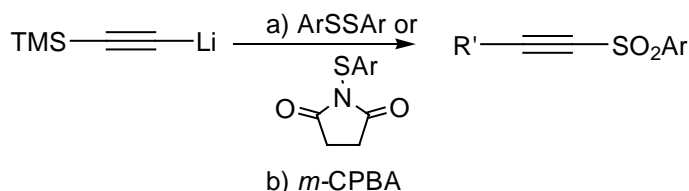

To a solution of trimethylsilylacetylene (1.5 g, 0.015 mmol) in anhydrous THF (20 mL) under argon atmosphere was added a 2.3M solution of *n*-BuLi in hexane (6.7 mL, 0.016 mmol) at  $-78$  °C. After 10 min., a solution of the disulfide or arylthiosuccinimide (0.015 mmol) in THF (10 mL) was added at  $-78$  °C.<sup>2</sup> Once the material was consumed (monitored by TLC), the reaction mixture was treated with 5 mL of saturated solution of  $\text{NH}_4\text{Cl}$ . Then, the mixture was diluted with 40 mL of  $\text{Et}_2\text{O}$ , dried with anhydrous  $\text{MgSO}_4$  and solvent was concentrated to dryness. To this crude mixture diluted in  $\text{CH}_2\text{Cl}_2$  (20 mL) was added dried *m*-CPBA (0.040 mmol) in 10 mL of  $\text{CH}_2\text{Cl}_2$ . Once the material was consumed (monitored by TLC), the crude mixture was treated with 10 mL of saturated solution of  $\text{Na}_2\text{SO}_3$ , washed with a saturated solution of  $\text{Na}_2\text{CO}_3$  (3x15 mL), and solvent was concentrated to dryness. The purification it is indicated in each case.

<sup>2</sup> The thioalkynes derivatives were prepared following the procedure described at: Savarin, C.; Srogl, J.; Liebeskind L. S. *Org. Lett.* **2001**, 3, 91.

### Phenylsulfonylethynyltrimetilsilane (**9a**)<sup>3</sup>

Following the general procedure the compound **9a** was obtained as colorless oil starting from phenyldisulfide. The product **9a** was used without further purification for the Heck reaction. Yield: 90%. <sup>1</sup>H-NMR (300 MHz)  $\delta$ : 7.97 (d,  $J$  = 7.8 Hz, 2H), 7.70-7.50 (m, 3H), 0.17 (s, 9H); <sup>13</sup>C-NMR (75 MHz)  $\delta$ : 141.1, 134.1, 129.2, 127.2, 101.9, 97.9, -1.3.

### 1-Ethynylsulfonyl-4-trifluoromethylbenzene (**8e**)

Following the general procedure the compound **8a** was obtained as a brown solid starting from trifluoromethylphenyldisulfide. The product **8a** was purified by column chromatography (hexane/AcOEt: 2/1). Yield: 85%. Brown solid; m.p.: 56.7-57.2 °C; IR (film): 3185, 2039, 1604, 1403 cm<sup>-1</sup>; <sup>1</sup>H-NMR (300 MHz)  $\delta$ : 7.90 and 7.80 (AA'BB' system  $J$  = 8.2 Hz, 4H), 3.82 (s, 1H); <sup>13</sup>C-NMR (75 MHz)  $\delta$ : 147.0, 133.0 (q,  $J_{C-F}$  = 33.5 Hz), 123.0 (q,  $J_{C-F}$  = 271.7 Hz), 126.5, 125.0, 91.3, 80.9.

### (4-Methoxybenzenesulfonylethynyl)trimethylsilane (**9b**)<sup>4</sup>

Following the general procedure the compound **9b** was obtained as white solid starting from 4-methoxyphenyldisulfide. The product **9b** was used without further purification for the Heck reaction. Yield: 81%; <sup>1</sup>H-NMR (300 MHz)  $\delta$ : 7.90 and 7.01 (AA'XX' system,  $J$  = 9.0 Hz, 4H), 3.86 (s, 3H), 0.18 (s, 9H); <sup>13</sup>C-NMR (75 MHz)  $\delta$ : 164.1, 132.6, 129.8, 114.4, 100.6, 98.5, 55.6, -1.2.

<sup>3</sup> Zhang, C.; Balley, C. J.; Trudell, M. *J. Chem., Perkin Trans 1*, **1999**, 675.

<sup>4</sup> Bhattacharya, S. N.; Josiah, B. M.; Walton, D. R. M. *Organometall. Chem. Syn.* **1971**, *1*, 145.

**(4-Chlorobenzenesulfonylethynyl)trimethylsilane (9d)**

Following the general procedure the compound **9d** was obtained as colorless oil starting from 4-chlorophenyldisulfide. The product **9d** was used without further purification for the Heck reaction. Yield: 99%.  $^1\text{H-NMR}$  (200 MHz)  $\delta$ : 7.94 and 7.55 (AA'BB',  $J = 8.6$  Hz, 4H), 0.20 (s, 9H);  $^{13}\text{C-NMR}$  (75 MHz)  $\delta$ : 142.3, 139.9, 130.9, 129.9, 92.5, 85.2, -1.9.

**4-Ethynylsulfonyl(4-chlorobenzene) (8d)**

Following the general procedure the compound **8d** was obtained as white solid starting from 1-chlorophenyldisulfide. The product **8d** was purified by column chromatography (hexane/AcOEt: 5/1). Yield: 68%; white solid; m.p.: 75-77 °C; IR (film): 3233, 3089, 2064, 1823, 1655, 1573, 1337  $\text{cm}^{-1}$ ;  $^1\text{H-NMR}$  (300 MHz)  $\delta$ : 7.92 and 7.55 (AA'BB' system,  $J = 5.7$  Hz, 4H), 3.63 (s, 1H);  $^{13}\text{C-NMR}$  (75 MHz)  $\delta$ : 141.3, 138.9, 129.7, 128.9, 92.5, 79.5; Anal. Calcd for  $\text{C}_8\text{H}_5\text{O}_2\text{S}$ ; C, 47.89; H, 2.51; S, 15.98; Found: C, 47.84; H, 2.46; S: 15.94.

**1-Ethynylsulfonyl-4-nitrobenzene (9c)**

Following the general procedure, the compound **9c** was obtained as yellow oil starting from 4-nitrophenyldisulfide. The product **9c** was purified by column chromatography (hexane/AcOEt: 15/1) as a yellow oil. Yield: 50%;  $^1\text{H-NMR}$  (300 MHz)  $\delta$ : 8.41 and 8.19 (AA'BB' system,  $J = 5.9$  Hz, 4H), 3.66 (s, 1H);  $^{13}\text{C-NMR}$  (75 MHz)  $\delta$ : 151.1, 145.8,

129.0, 124.6, 83.8, 78.9. Anal. Calcd for  $C_8H_5NO_2S$ : C, 45.50; H, 2.39; S, 15.18; Found: C, 45.40; H, 2.41; S: 15.29.

### General method for Mizoroki-Heck reaction

In a sealed tube the corresponding sulfone (0.55 mmol, 1 equiv),  $Pd(AcO)_2$  (5 mol%),  $Ag_2CO_3$  (2 equiv) and  $PCy_3$  (10 mol%) in anhydrous DMF (2 mL) was heated at 120 °C under argon atmosphere. Once the material was consumed (monitored by TLC), the crude mixture was diluted with  $Et_2O$  (5 mL), and the organic phase was washed with HCl (5%). Finally, the organic phase was dried with anhydrous  $MgSO_4$  and solvent was concentrated to dryness. The residue was purified by flash-column chromatograph (eluent is indicated in each case).

### (*E*)-1-(Phenylsulfonyl)-2-phenylethene (**5**)

Following the general procedure for Mizoroki-Heck reaction without  $PCy_3$ , the compound **5** was obtained as white solid starting from the commercial available phenylvinylsulfone. The product **5** was purified by flash-column chromatography: *n*-hexane-AcOEt 6:1; yield: 59%; white solid; mp. = 72-73 °C; IR (KBr): 3000, 1605, 1480, 1325, 1175, 750  $cm^{-1}$ ;  $^1H$  NMR (200 MHz):  $\delta$  7.93 (dd,  $J$  = 7.5, 1.0 Hz, 2H), 7.68 (d,  $J$  = 15.5 Hz, 1H), 7.20-7.40 (m, 8H), 6.85 (d,  $J$  = 15.5 Hz, 1H);  $^{13}C$  NMR (75 MHz):  $\delta$  142.3, 140.4, 133.2, 132.0, 131.0, 129.1, 128.8, 128.3, 127.3; MS (EI):  $m/z$  244 ( $M^+$ , 58), 125 (22), 119 (56), 103 (66), 102 (93), 91 (100), 77 (99).

**(E)- 1-(Phenylsulfinyl)-2-phenylethene (2)**<sup>5</sup>

Following the general procedure for Mizoroki-Heck reaction without PCy<sub>3</sub>, the compound **2** was obtained as yellow oil starting from commercial available phenylvinylsulfoxide. The product **2** was purified by flash-column chromatography: *n*-hexane-AcOEt 3:1; yield: 57%; yellow oil; <sup>1</sup>H NMR (200 MHz): δ 7.72-7.29 (m, 11H), 6.83 (d, *J* = 15.6 Hz, 1H), 6.48 (d, *J* = 15.6 Hz, 1H).

**(E)-Ethyl cinnamate (12a)**<sup>6</sup>

Following the general procedure for Mizoroki-Heck reaction with ethyl acrylate (2 equiv) starting from different sulfones (see Table 2 and 3 of the manuscript), the compound **12a** was obtained as colorless oil. The product **12a** was purified by flash-column chromatography: *n*-hexane-AcOEt 15:1; colorless oil. Yield: 25-55%; <sup>1</sup>H-NMR (300 MHz) δ: 7.67 (d, *J* = 16.0 Hz, 1H), 7.53 (m, 2H), 7.50 (m, 3H), 6.42 (d, *J* = 16.0 Hz, 1H), 4.26 (q, *J* = 7.2 Hz, 2H), 1.32 (t, *J* = 7.2 Hz, 3H).

**(E)-Butyl cinnamate (13a)**<sup>7</sup>

Following the general procedure for Mizoroki-Heck reaction with butyl acrylate (2 equiv) starting from different sulfones (see manuscript), the compound **13a** was obtained as yellow oil. The product **13a** was purified by flash-column chromatography: *n*-hexane-AcOEt 15:1; yellow oil. Yield: 25-68 %. <sup>1</sup>H-NMR (200 MHz) δ: 7.75 (d, *J* = 16.1 Hz,

<sup>5</sup> Mikolajczyk, M.; Perlikowska, W.; Omelanczuk, J.; Cristau, H.-J.; Darcy, A.-P. *J. Org. Chem.* **1998**, *63*, 9716.

<sup>6</sup> Product commercial available from Aldrich.

<sup>7</sup> Product commercial available from Lancaster Synthesis.

1H), 7.70-7.38 (m, 5H), 6.44 (d,  $J = 16.1$  Hz, 1H), 4.24 (t,  $J = 6.4$  Hz, 2H), 1.69 (m, 2H), 1.60 (m, 2H), 0.96 (t,  $J = 7.5$  Hz, 3H).

**(*E*)-Butyl-3-*p*-tolylacrylate (13f)**<sup>8</sup>

Following the general procedure for Mizoroki-Heck reaction with butyl acrylate (3 equiv) starting from commercial available ethynylphenylsulfone (100 mg, 0.55 mmol), the compound **13f** was obtained as yellow oil. The product **13f** was purified by flash-column chromatography: *n*-hexane-AcOEt 15:1; yellow oil. Yield: 41%; <sup>1</sup>H-NMR (200 MHz)  $\delta$ : 7.66 (d, 1H,  $J = 15.5$  Hz), 7.42 and 7.25 (AA'XX',  $J = 8.3$  Hz, 4H), 6.42 (d,  $J = 15.5$  Hz, 1H), 4.20 (t,  $J = 6.5$  Hz, 2H), 2.36 (s, 3H), 1.69 (m, 2H), 1.45 (m, 2H), 0.96 (t,  $J = 7.4$  Hz, 3H); <sup>13</sup>C-NMR (75 MHz)  $\delta$ : 167.2, 144.4, 140.5, 131.7, 129.5, 128.0, 117.1, 64.2, 30.7, 21.3, 19.1, 13.7.

**(*E*)-Butyl-3-(4-methoxyphenyl)acrylate (13b)**<sup>9</sup>

Following the general procedure for Mizoroki-Heck reaction with butyl acrylate (3 equiv) starting from **9b** (100 mg, 0.40 mmol), the compound **13b** was obtained as yellow oil. The product **13b** was purified by flash-column chromatography: *n*-hexane-AcOEt 15:1; yellow oil. Yield: 30 %. <sup>1</sup>H-NMR (300 MHz)  $\delta$ : 7.55 (d,  $J = 16.0$  Hz, 1H), 7.37 (d,  $J = 8.7$  Hz, 2H), 6.80 (d,  $J = 8.7$  Hz, 2H), 6.21 (d,  $J = 16.0$  Hz, 1H), 4.12 (t,  $J = 6.8$  Hz, 2H), 3.69 (s, 3H), 1.60 (tt,  $J = 6.8, 6.8$  Hz, 2H), 1.33 (qt,  $J = 7.3, 6.8$  Hz, 2H), 0.87 (q,  $J = 7.3$  Hz, 3H).

<sup>8</sup> Yang, C.; Lee, H. M.; Nolan, S. P. *Org. Lett.* **2001**, 3, 1511.

<sup>9</sup> Feuerstein, M.; Doucet, H.; Santelli, M.; *J. Org. Chem.* **2001**, 66, 5923.



**(E)-Butyl-3-[4-(trifluoromethyl)phenyl]acrylate (13e)**<sup>10</sup>

Following the general procedure for Mizoroki-Heck reaction with butyl acrylate (3 equiv) starting from **8e** (100 mg, 0.45 mmol), the compound **13e** was obtained as yellow oil. The product **13e** was purified by flash-column chromatography: *n*-hexane-AcOEt 9:1; yellow oil (57 mg). Yield: 47%. <sup>1</sup>H-NMR (300 MHz)  $\delta$ : 7.60 (d, *J* = 16.1 Hz, 1H), 7.55 (m, 4H), 6.43 (d, *J* = 16.1 Hz, 1H), 6.43 (d, *J* = 16.1 Hz, 1H), 4.15 (t, *J* = 6.8 Hz, 2H), 1.62 (tt, *J* = 6.8, 6.8 Hz, 2H), 1.36 (qt, *J* = 6.8, 7.3 Hz, 2H), 0.89 (q, *J* = 7.3 Hz, 3H).

**(E)-Butyl-3-(4-chlorophenyl)acrylate (13d)**<sup>11</sup>

Following the general procedure for Mizoroki-Heck reaction with butyl acrylate (3 equiv) starting from the compound **9d** (100 mg, 0.45 mmol), the compound **13d** was obtained as yellow oil. The product **13d** was purified by flash-column chromatography: *n*-hexane-AcOEt 9:1; yellow oil (37 mg). Yield: 30%. <sup>1</sup>H-NMR (300 MHz)  $\delta$ : 7.61 (d, 1H, *J* = 15.9 Hz), 7.43 (d, 2H, *J* = 8.6 Hz), 7.33 (d, 2H, *J* = 8.6 Hz), 6.38 (d, 1H, *J* = 15.9 Hz), 4.21 (t, 2H, *J* = 6.8 Hz), 1.60 (tt, 2H, *J* = 6.8, 6.8 Hz), 1.33 (qt, 2H, *J* = 7.3, 6.8 Hz), 0.87 (q, 3H, *J* = 7.3 Hz).

**(E)-Butyl -3-(4-nitrophenyl)acrylate (13c)**<sup>12</sup>

Following the general procedure for Mizoroki-Heck reaction with butyl acrylate (3 equiv) starting from the compound **8c** (122 mg, 0.49 mmol), the compound **13c** was obtained as yellow oil. The product **13c** was purified by flash-column chromatography: *n*-hexane-

<sup>10</sup> Hirabayashi, K.; Ando, J.-I.; Nishihara, Y.; Mori, A.; Hiyama, T. *Synlett*. **1999**, 99.

<sup>11</sup> Du, X.; Suguro, M.; Hirabayashi, K.; Mori, A. *Org. Lett.* **2001**, 21, 3313.

<sup>12</sup> (a) Gruber, A.; Zim, D.; Ebeling, G.; Monteiro, A.; Dupont J. *Org. Lett.* **2000**, 9, 1287. (b) Feuerstein, M.; Docet, H.; Santelli, M. *J. Org. Chem.* **2001**, 5923.

AcOEt 9:1; yellow oil (67 mg). Yield: 55%;  $^1\text{H}$ -NMR (300 MHz)  $\delta$ : 8.18 (d,  $J = 8.8$  Hz, 2H), 7.66 (d,  $J = 16.0$  Hz, 1H), 7.65 (d,  $J = 8.8$  Hz, 2H), 6.52 (d,  $J = 16.0$  Hz, 1H), 4.17 (t,  $J = 7.3$  Hz, 2H), 1.80-1.20 (m, 4H) 0.92 (t,  $J = 7.3$  Hz, 3H).
